# Supplementary material for: An anionic potassium-organic framework for selective removal of uranyl ions
Source: Royal Society of Chemistry journal article supplement (doi:10.1039/d1dt00822f), 2021-01-01
Supplement: d1dt00822f1.pdf [file d1dt00822f1.pdf]

## Supporting Information

### **An Anionic Potassium-Organic Framework for Selective Removal of Uranyl Ions**

*Qianqian Yang,<sup>a</sup> Yijie Wang,<sup>a</sup> Jianjian Yang,<sup>a</sup> Jianbo Yin,<sup>a</sup> Di Liu,<sup>a</sup> Ning Liu,<sup>a</sup> Rongming Wang,<sup>\*,a,b</sup> Daofeng Sun,<sup>\*,a,b</sup> Xiyu Li,<sup>a,b</sup> and Jianzhuang Jiang<sup>\*,c</sup>*

<sup>a</sup>School of Science, China University of Petroleum (East China), Qingdao, Shandong 266580, China

<sup>b</sup>State Key Laboratory of Heavy Oil Processing, School of Materials Science and Engineering, China University of Petroleum (East China), Qingdao, Shandong 266580, China

<sup>c</sup>Beijing Key Laboratory for Science and Application of Functional Molecular and Crystalline Materials, Department of Chemistry, University of Science and Technology Beijing, Beijing 100083, China

\*To whom correspondence should be addressed.

E-mail: [dfsun@upc.edu.cn](mailto:dfsun@upc.edu.cn), [rmwang@upc.edu.cn](mailto:rmwang@upc.edu.cn), [jianzhuang@ustb.edu.cn](mailto:jianzhuang@ustb.edu.cn).

**Table S1.** Crystallographic data of UPC-K1.

---

|                                                     |                                                                                 |
|-----------------------------------------------------|---------------------------------------------------------------------------------|
| empirical formula                                   | C <sub>56</sub> H <sub>42</sub> NO <sub>8</sub> K                               |
| formula weight                                      | 896.03                                                                          |
| temperature (K)                                     | 293(2)                                                                          |
| crystal system                                      | Orthorhombic                                                                    |
| space group                                         | <i>C</i> 222(1)                                                                 |
| <i>a</i> (Å)                                        | 10.2471 (2)                                                                     |
| <i>b</i> (Å)                                        | 43.0335 (8)                                                                     |
| <i>c</i> (Å)                                        | 10.3618 (2)                                                                     |
| <i>α</i> (deg)                                      | 90                                                                              |
| <i>β</i> (deg)                                      | 90                                                                              |
| <i>γ</i> (deg)                                      | 90                                                                              |
| volume (Å <sup>3</sup> )                            | 4569.23(15)                                                                     |
| <i>Z</i>                                            | 4                                                                               |
| ρ <sub>calc</sub> (g/cm <sup>3</sup> )              | 1.302                                                                           |
| μ (mm <sup>-1</sup> )                               | 1.494                                                                           |
| <i>F</i> (000)                                      | 1872                                                                            |
| Data/ restraints/parameters                         | 4351/31/318                                                                     |
| GOF on <i>F</i> <sup>2</sup>                        | 1.035                                                                           |
| Independent reflections                             | 4351 [ <i>R</i> <sub>int</sub> = 0.0236,<br><i>R</i> <sub>sigma</sub> = 0.0195] |
| Final <i>R</i> indexes [ <i>I</i> ≥ 2σ( <i>I</i> )] | <i>R</i> <sub>1</sub> = 0.0424, <i>wR</i> <sub>2</sub> = 0.1232                 |
| Final <i>R</i> indexes [all data]                   | <i>R</i> <sub>1</sub> = 0.0449, <i>wR</i> <sub>2</sub> = 0.1274                 |
| Flack parameter                                     | 0.013(5)                                                                        |
| <i>N</i> <sub>ref</sub>                             | 4351                                                                            |

---

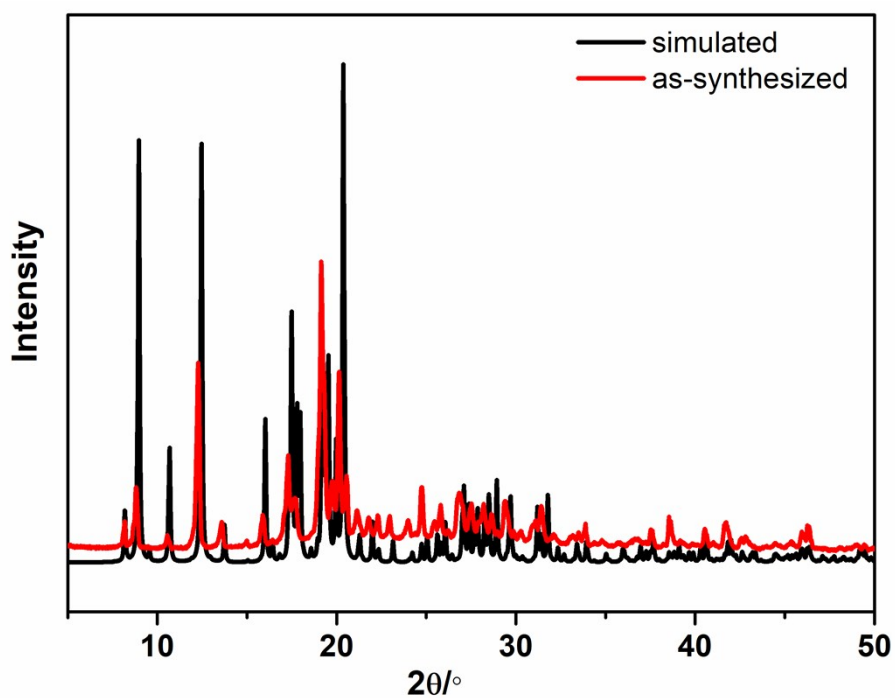

**Fig. S1** The simulated (black) and as-synthesized (red) PXR D patterns of UPC-K1.

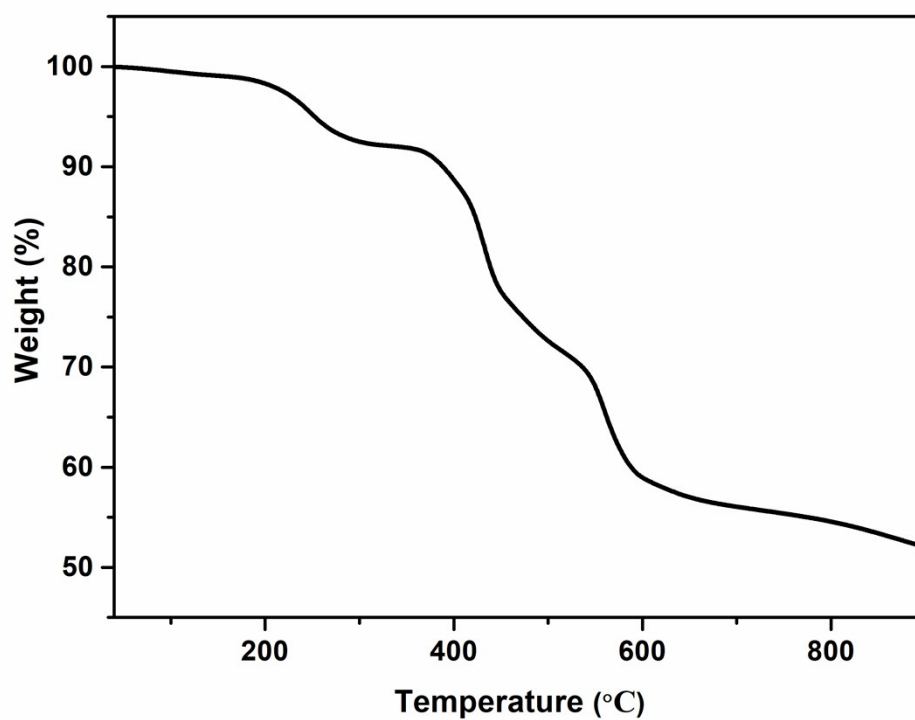

**Fig. S2** TGA curve of UPC-K1.

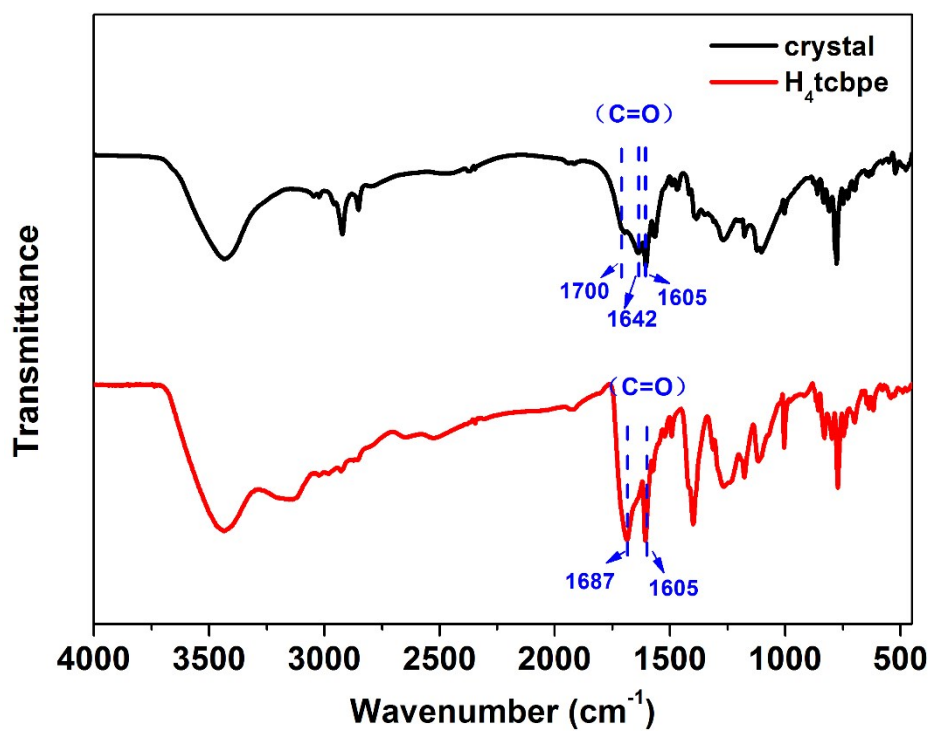

Fig. S3 IR spectra of H<sub>4</sub>tcbpe and UPC-K1.

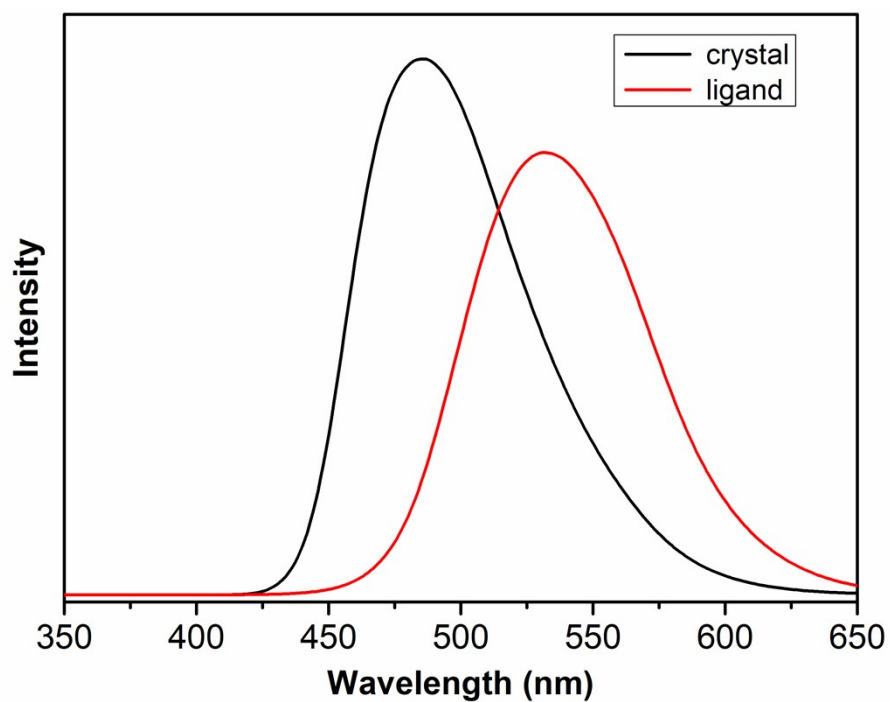

Fig. S4 The fluorescent spectra of H<sub>4</sub>tcbpe and UPC-K1 in the solid state at room temperature.

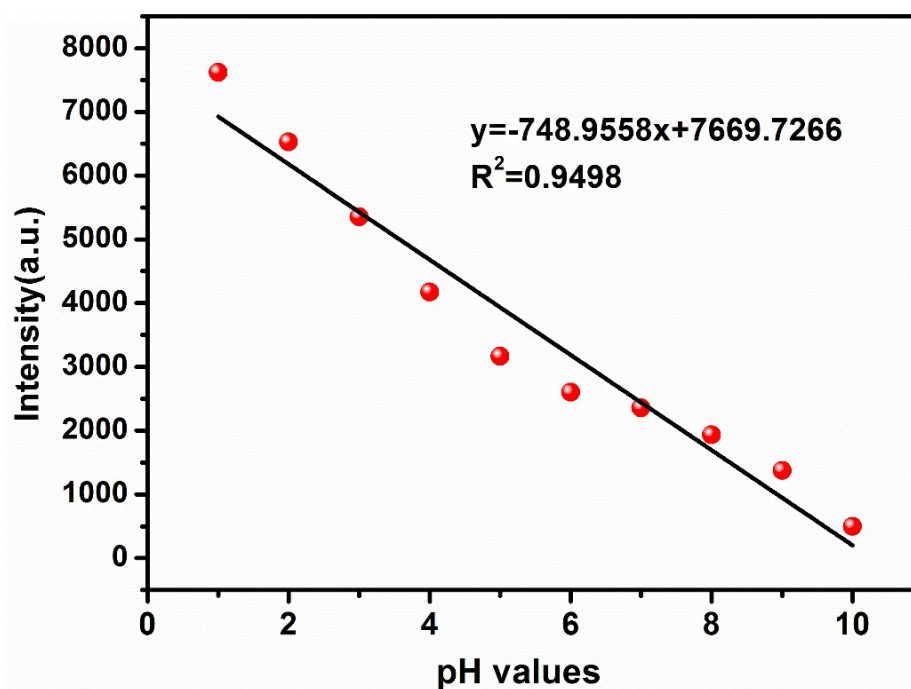

**Fig. S5** The linear relation between the peak intensities of fluorescent spectra and the related pH values of solutions after immersing 2 mg of UPC-K1 in 2 mL of different pH value aqueous solutions.

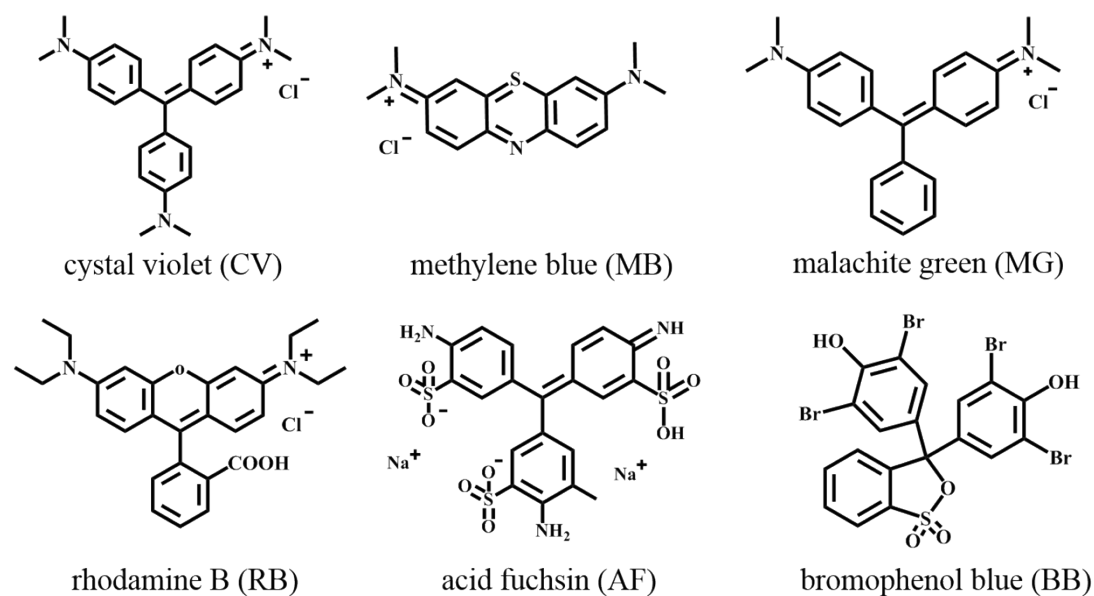

**Scheme S1.** Schematic molecular structures of crystal violet (CV), methylene blue (MB), malachite green (MG), rhodamine B (RB), acid fuchsin (AF) and bromophenol blue (BB).

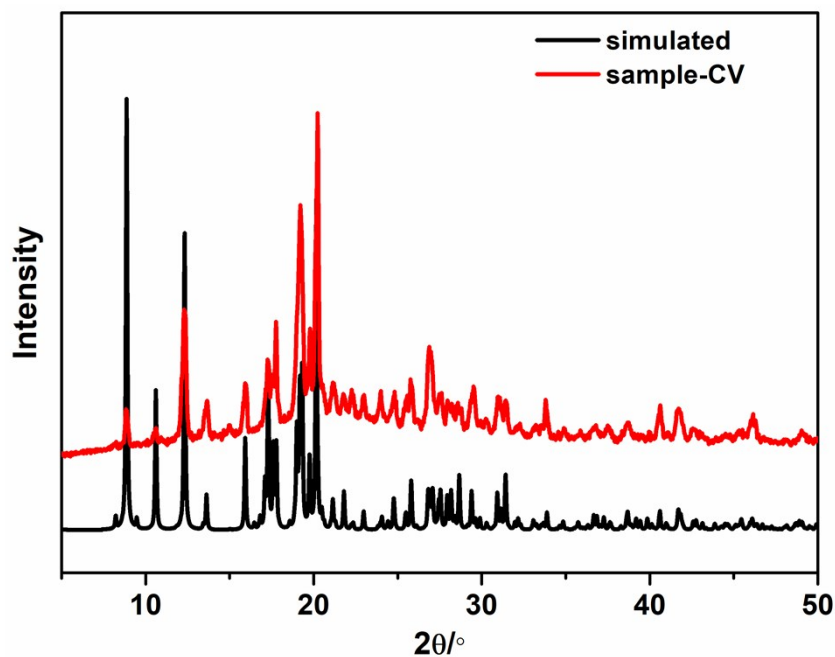

**Fig. S6** The PXR D patterns of UPC-K1 before (black) and after (red) adsorbing crystal violet (CV).

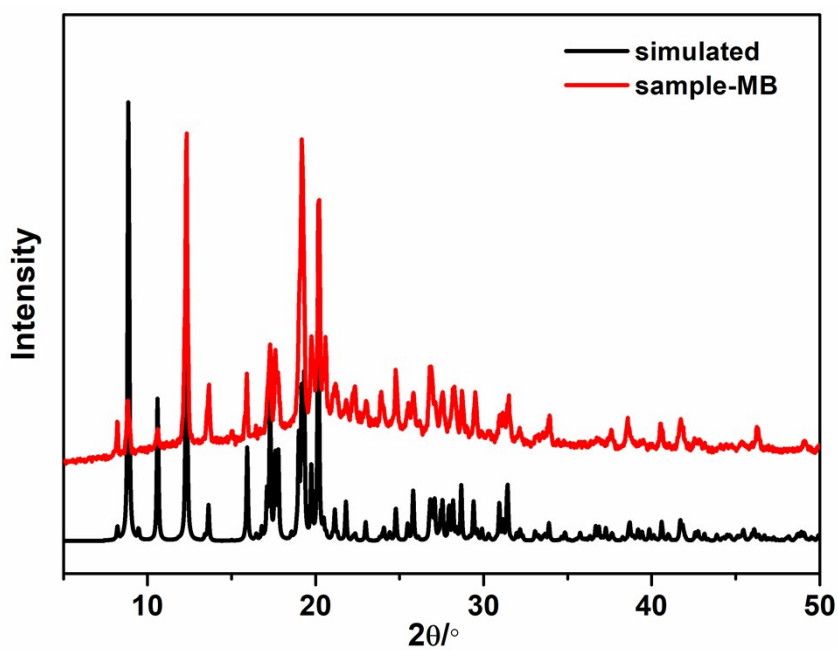

**Fig. S7** The PXR D patterns of UPC-K1 before (black) and after (red) adsorbing methylene blue (MB).

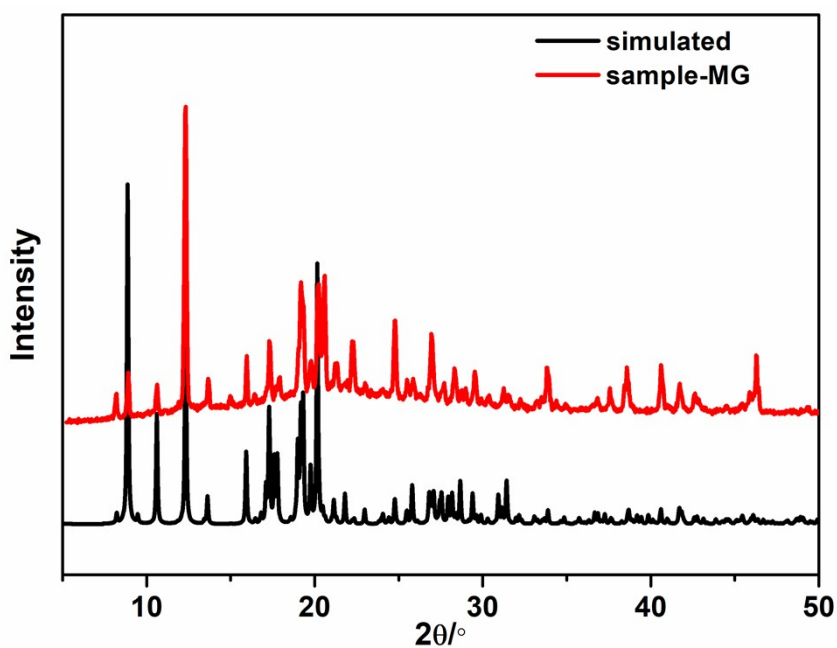

**Fig. S8** The PXRD patterns of UPC-K1 before (black) and after (red) adsorbing malachite green (MG).

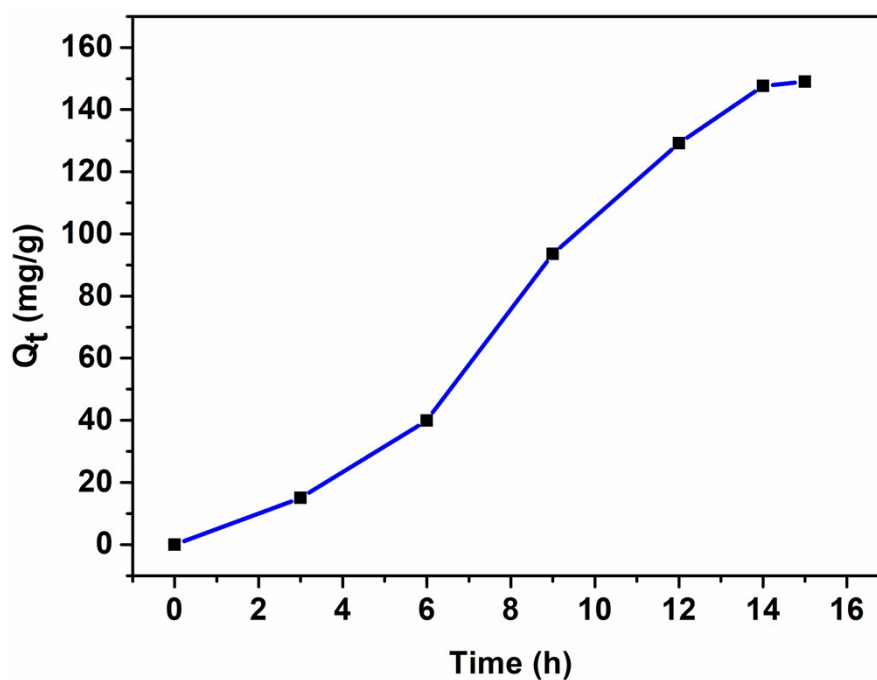

**Fig. S9** The  $\text{UO}_2^{2+}$  adsorption quantity ( $Q_t$ ) in different times after immersing 30 mg of UPK-1 into 4 mL of 2.2 mmol/L  $\text{Zn}(\text{UO}_2)_2(\text{CH}_3\text{OO})_6$  aqueous solutions.

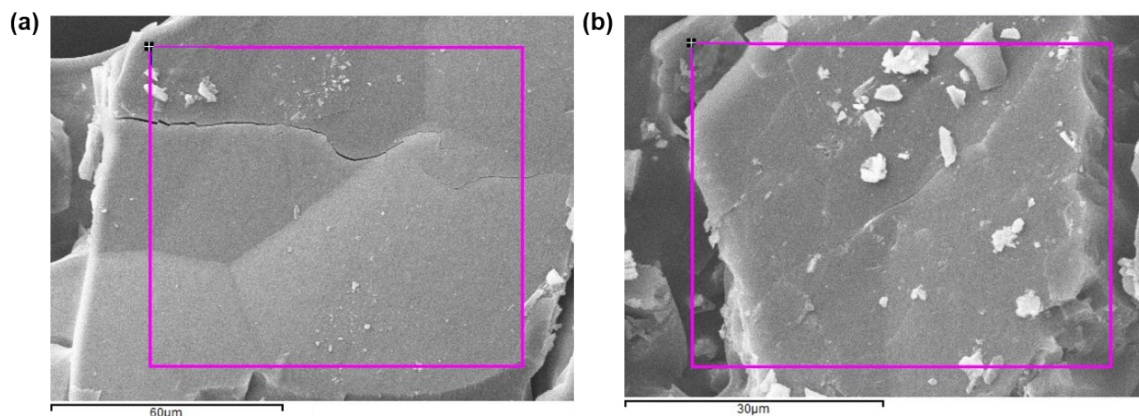

**Fig. S10** The SEM images of UPC-K1 (30 mg) before (a) and after (b) adsorbing  $\text{UO}_2^{2+}$  in 4 mL of 2.2 mmol/L uranyl zinc acetate solution for 15 hours.

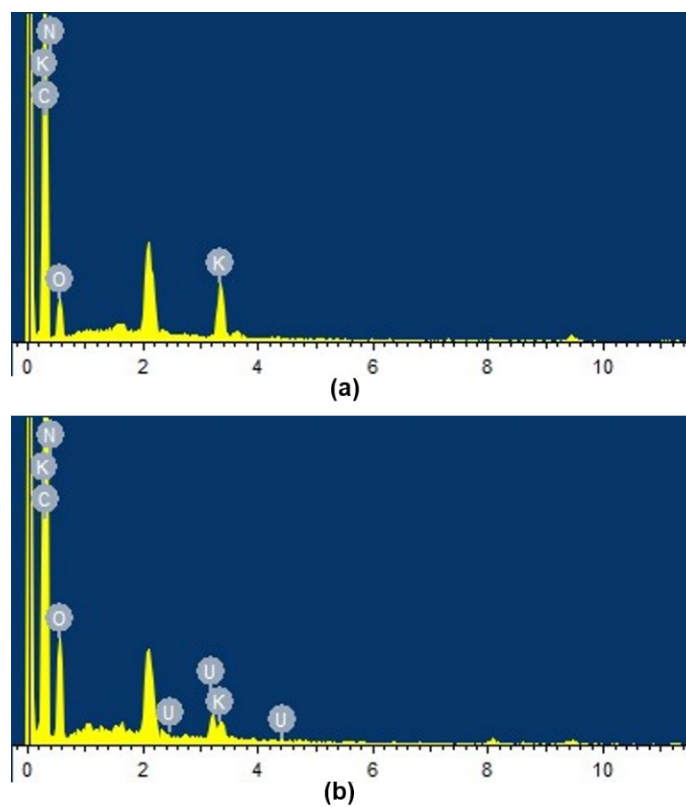

**Fig. S11** The EDS spectra of UPC-K1 (30 mg) before (a) and after (b) adsorbing  $\text{UO}_2^{2+}$  in 4 mL of 2.2 mmol/L uranyl zinc acetate solution for 15 hours.



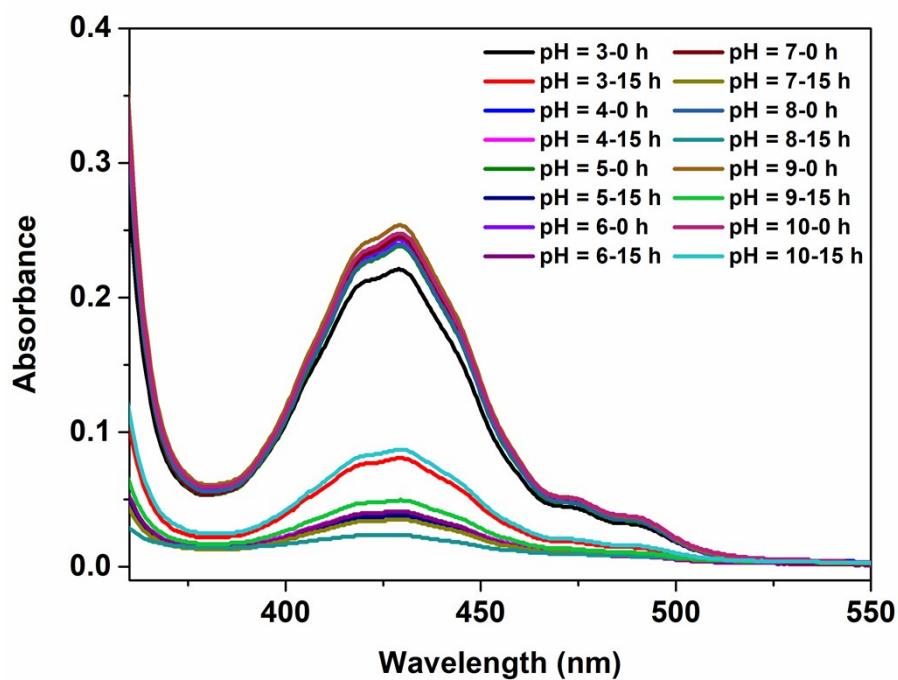

**Fig. S12** The pH-dependent  $\text{UO}_2^{2+}$  adsorption of UPC-K1 detected by the UV-vis spectra. Note: 30 mg of crystals immersed in 4 mL of 2.2 mmol/L  $\text{Zn}(\text{UO}_2)_2(\text{CH}_3\text{OO})_6$  solution.

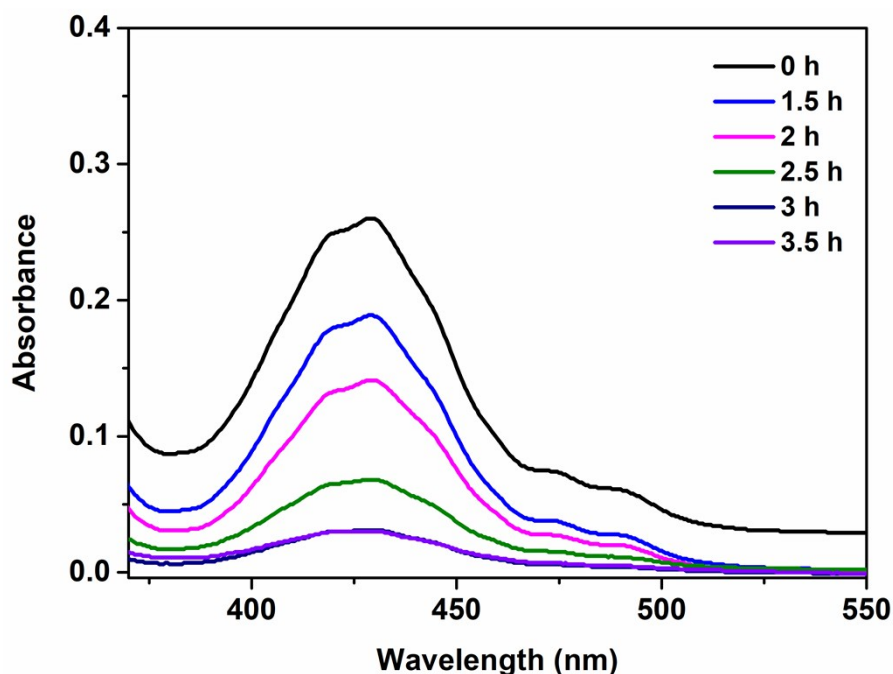

**Fig. S13** UV-vis spectra of the filtered solutions after immersing 15 mg of slightly ground UPC-K1 in 4 mL of 2.2 mol/L  $\text{Zn}(\text{UO}_2)_2(\text{CH}_3\text{OO})_6$  solutions under stirring for 24 hours.

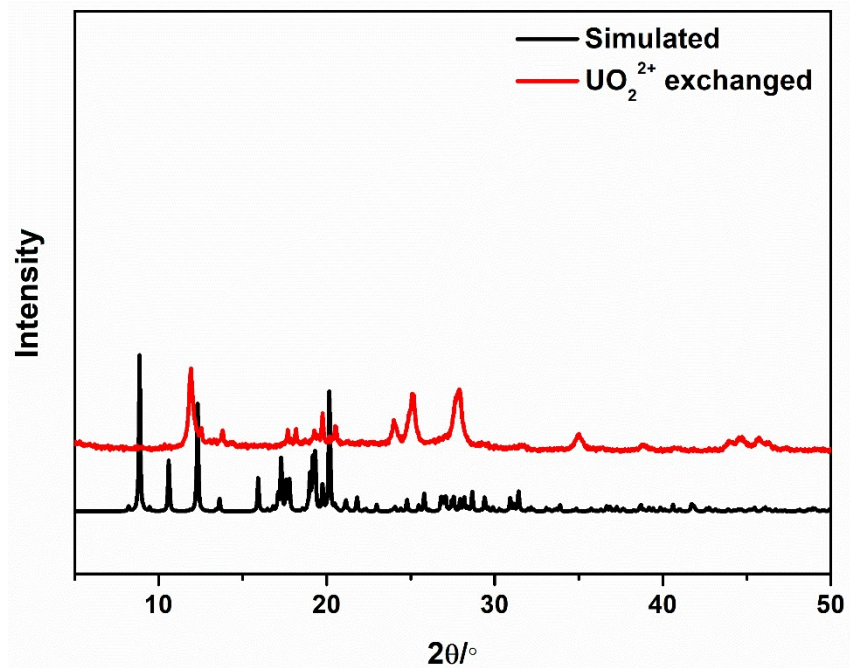

**Fig. S14** PXR D patterns of UPC-K1 before and after immersing 15 mg of slightly ground UPC-K1 in 4 mL of 4.4 mmol/L Zn(UO<sub>2</sub>)<sub>2</sub>(CH<sub>3</sub>OO)<sub>6</sub>·7H<sub>2</sub>O solutions under stirring for 5.5 hours.

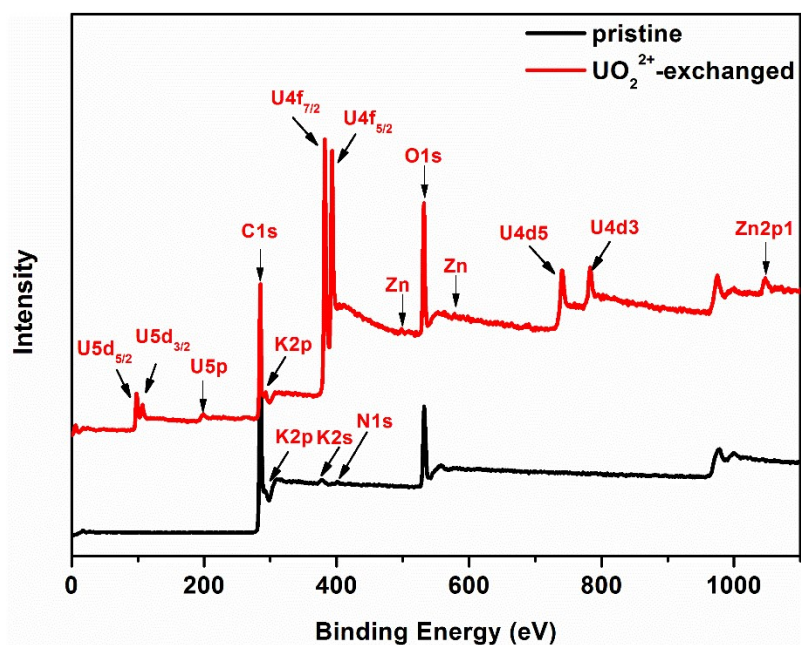

**Fig. S15** XPS spectra of UPC-K1 before and after immersing 15 mg of slightly ground UPC-K1 in 4 mL of 4.4 mmol/L Zn(UO<sub>2</sub>)<sub>2</sub>(CH<sub>3</sub>OO)<sub>6</sub>·7H<sub>2</sub>O solutions under stirring for 5.5 hours.

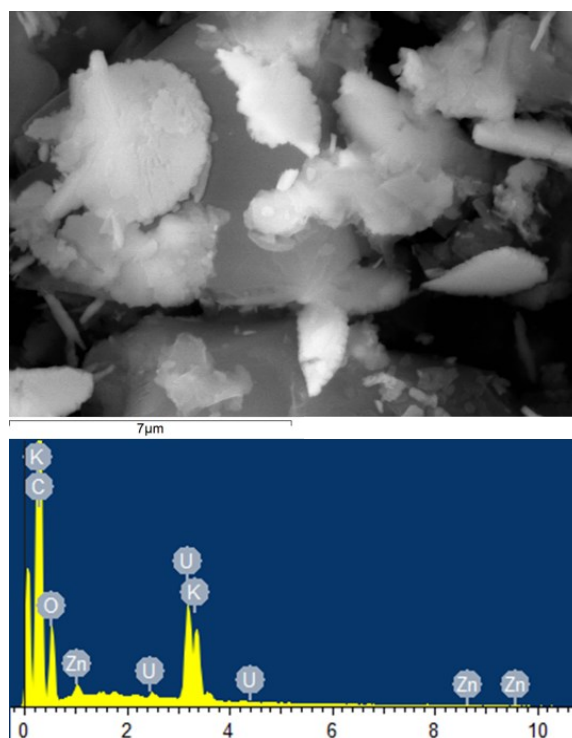

**Fig. S16** The SEM image and EDS spectrum of UPC-K1 after immersing 15 mg of slightly ground UPC-K1 in 4 mL of 4.4 mmol/L  $\text{Zn}(\text{UO}_2)_2(\text{CH}_3\text{OO})_6 \cdot 7\text{H}_2\text{O}$  solutions under stirring for 5.5

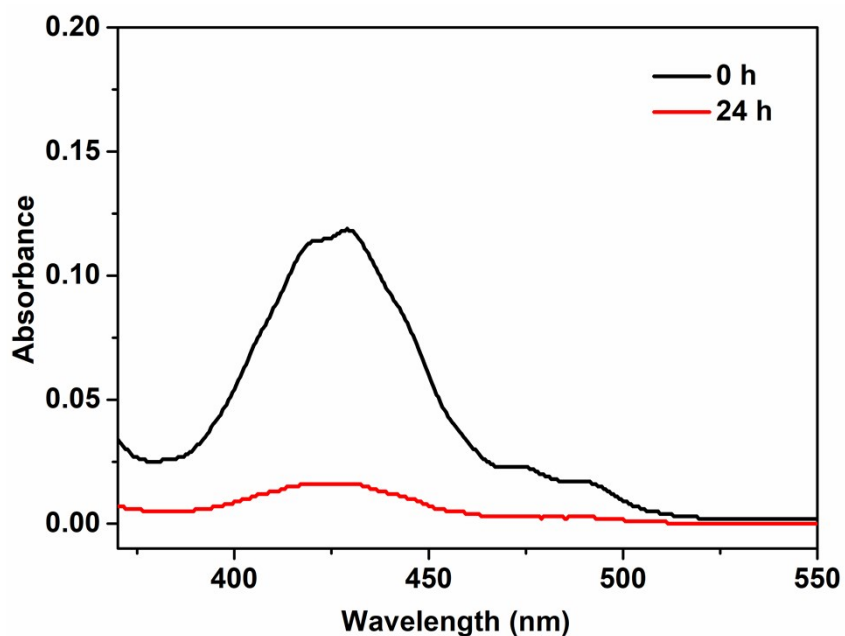

**Fig. S17** UV-vis spectra of the filtered solutions after immersing 15 mg of slightly ground UPC-K1 in 16 mL of 1.1 mmol/L  $\text{Zn}(\text{UO}_2)_2(\text{CH}_3\text{OO})_6$  solutions under stirring for different times.

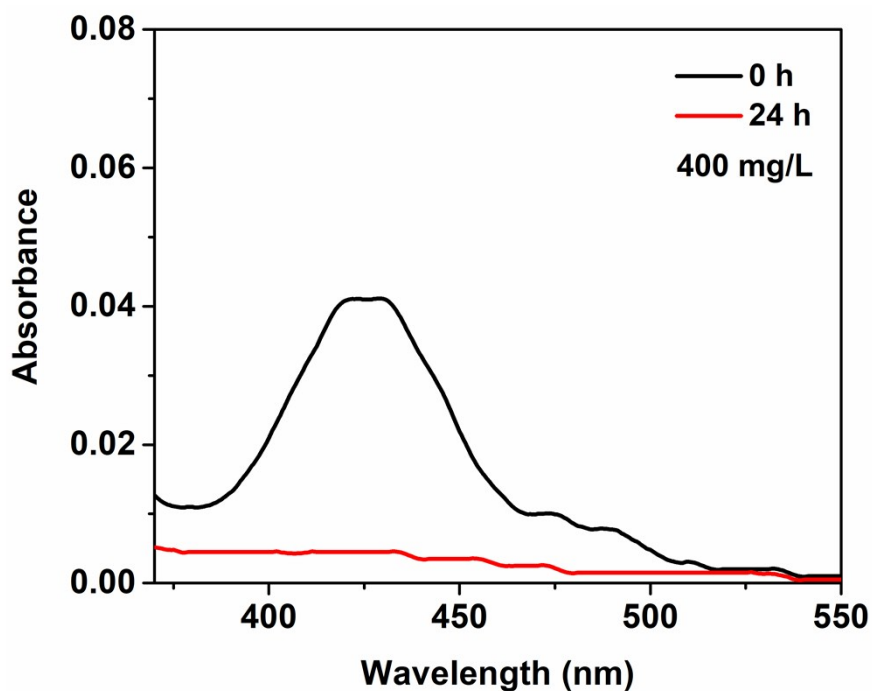

**Fig. S18** UV-vis spectra of the filtered solutions after immersing 5 mg of as-synthesized UPC-K1 in 4 mL of 400 mg/L uranyl zinc acetate solutions at static state for 24 hours.

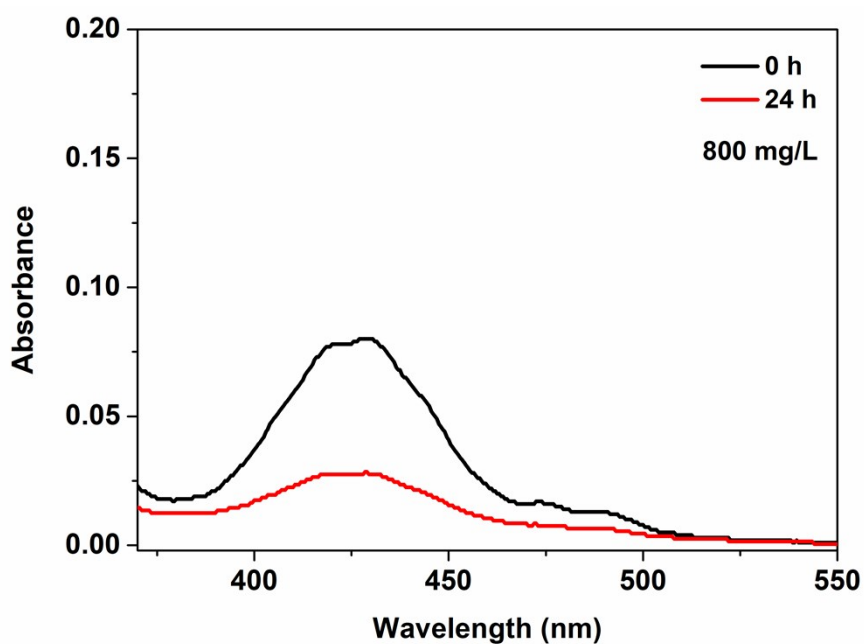

**Fig. S19** UV-vis spectra of the filtered solutions after immersing 5 mg of as-synthesized UPC-K1 in 4 mL of 800 mg/L uranyl zinc acetate solutions at static state for 24 hours.

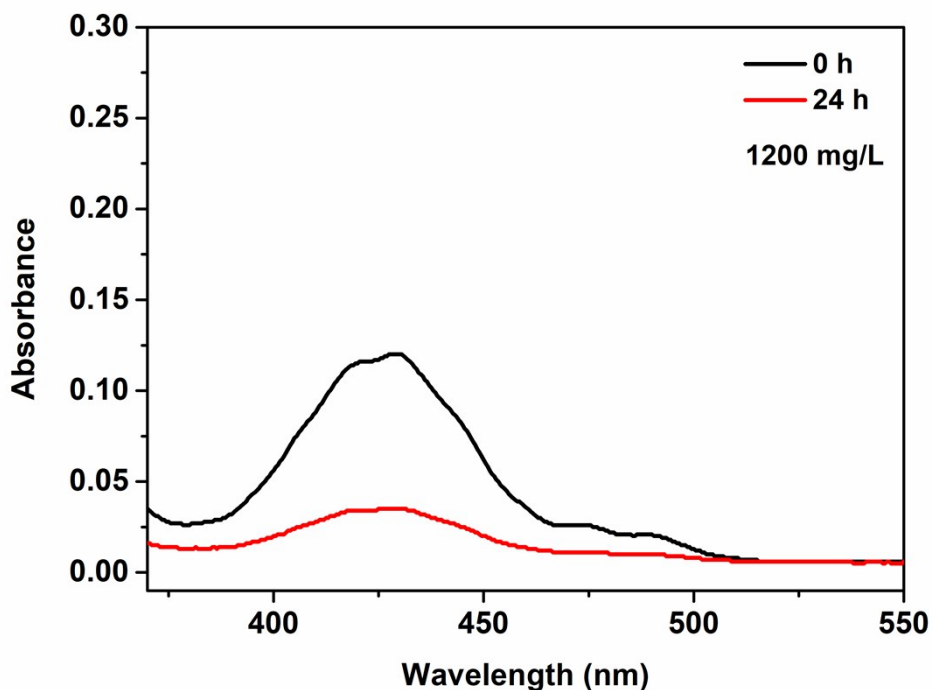

**Fig. S20** UV-vis spectra of the filtered solutions after immersing 5 mg of as-synthesized UPC-K1 in 4 mL of 1200 mg/L uranyl zinc acetate solutions at static state for 24 hours.

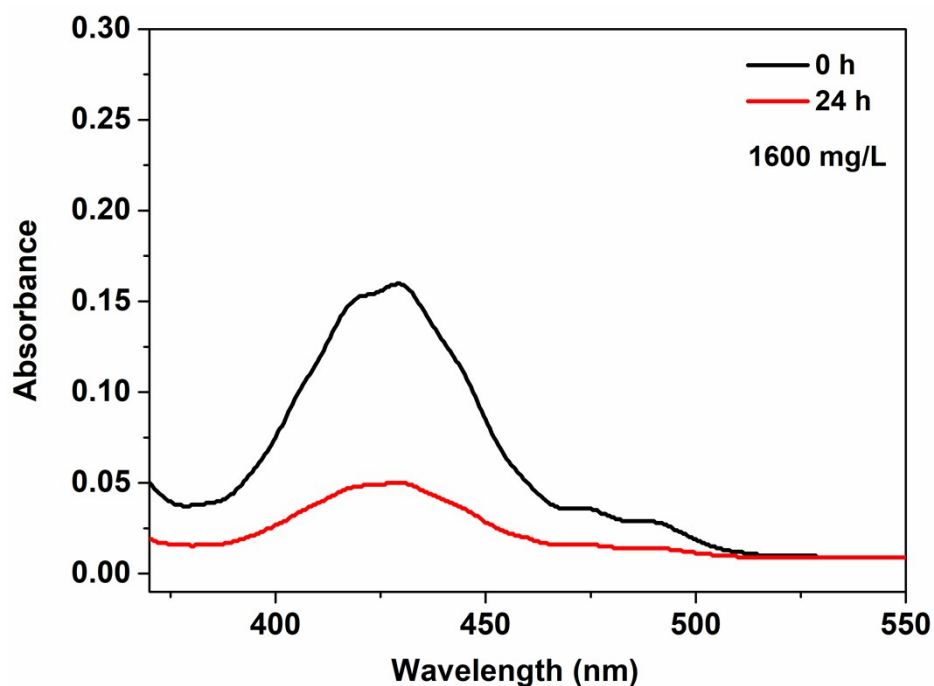

**Fig. S21** UV-vis spectra of the filtered solutions after immersing 5 mg of as-synthesized UPC-K1 in 4 mL of 1600 mg/L uranyl zinc acetate solutions at static state for 24 hours.

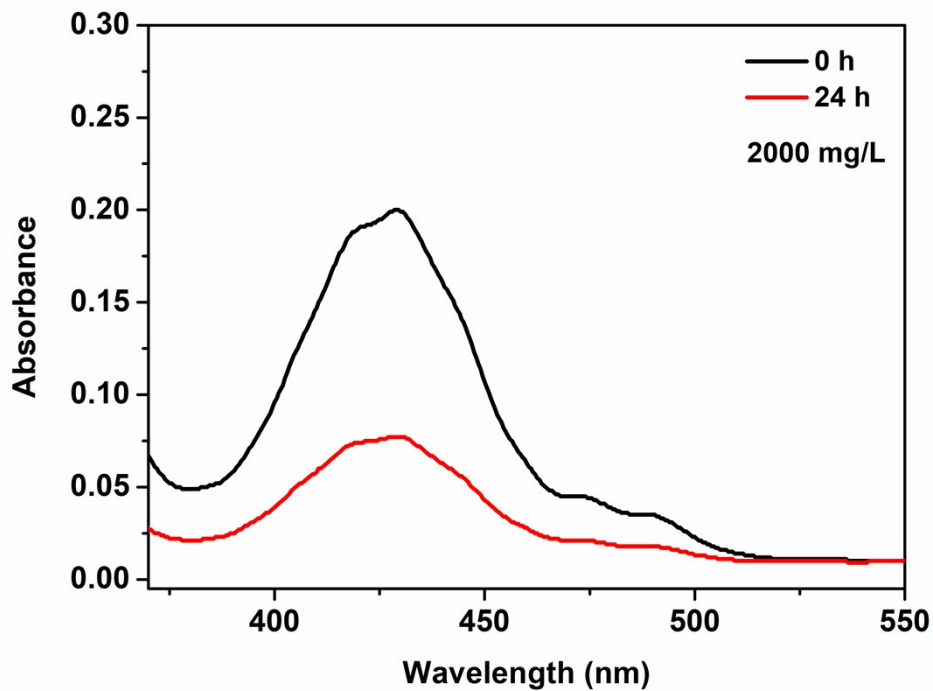

**Fig. S22** UV-vis spectra of the filtered solutions after immersing 5 mg of as-synthesized UPC-K1 in 4 mL of 2000 mg/L uranyl zinc acetate solutions at static state for 24 hours.

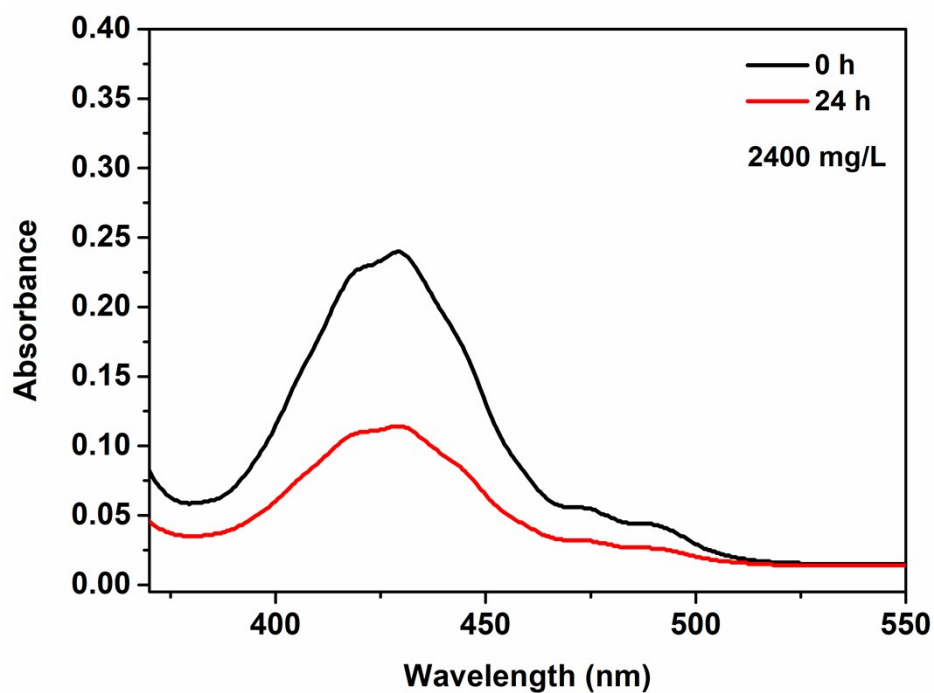

**Fig. S23** UV-vis spectra of the filtered solutions after immersing 5 mg of as-synthesized UPC-K1 in 4 mL of 2400 mg/L uranyl zinc acetate solutions at static state for 24 hours.

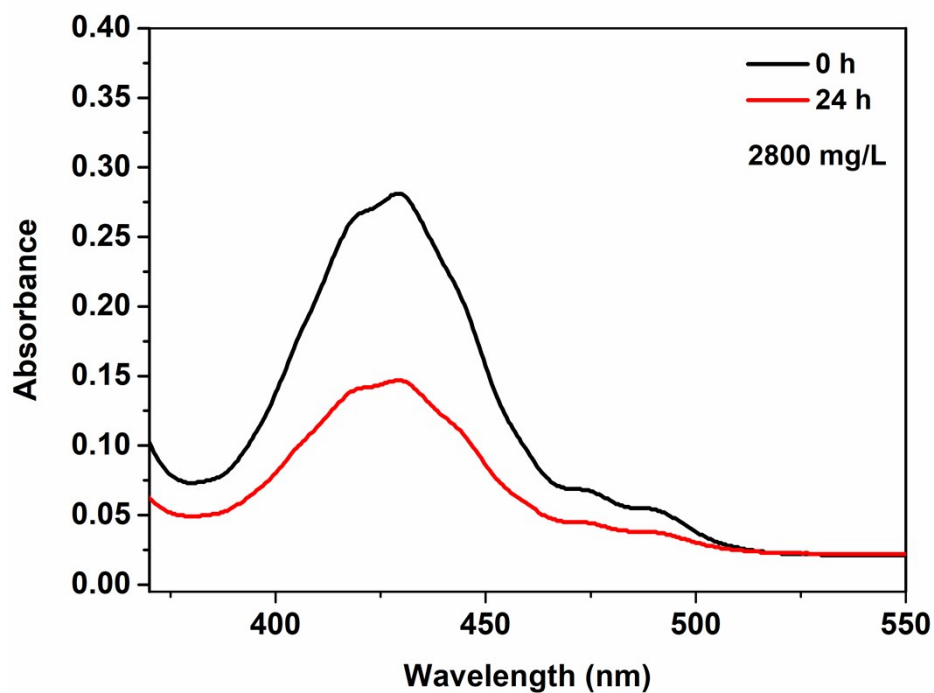

**Fig. S24** UV-vis spectra of the filtered solutions after immersing 5 mg of as-synthesized UPC-K1 in 4 mL of 2800 mg/L uranyl zinc acetate solutions at static state for 24 hours.

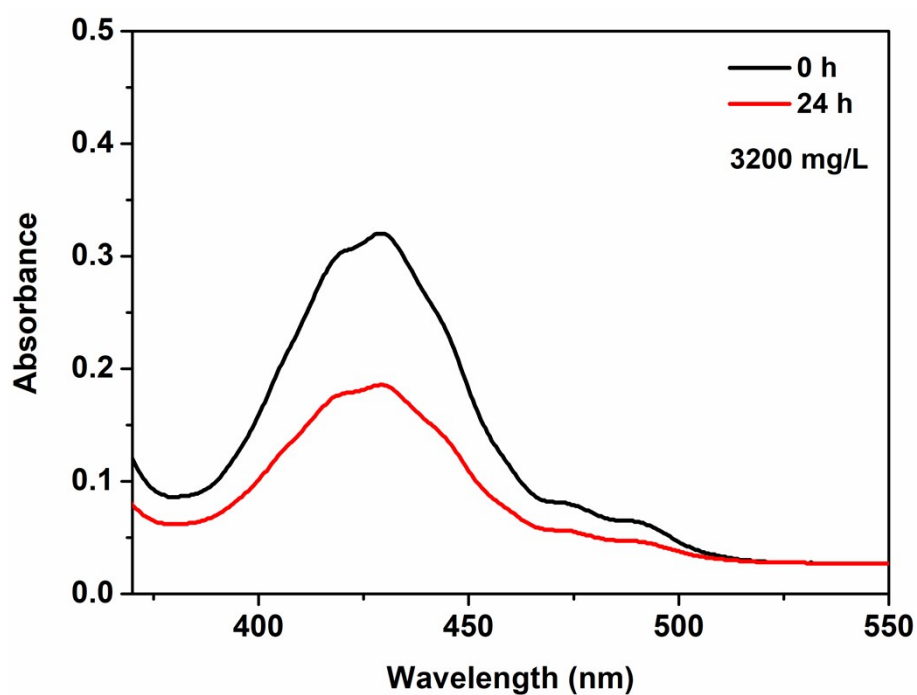

**Fig. S25** UV-vis spectra of the filtered solutions after immersing 5 mg of as-synthesized UPC-K1 in 4 mL of 3200 mg/L uranyl zinc acetate solutions at static state for 24 hours.

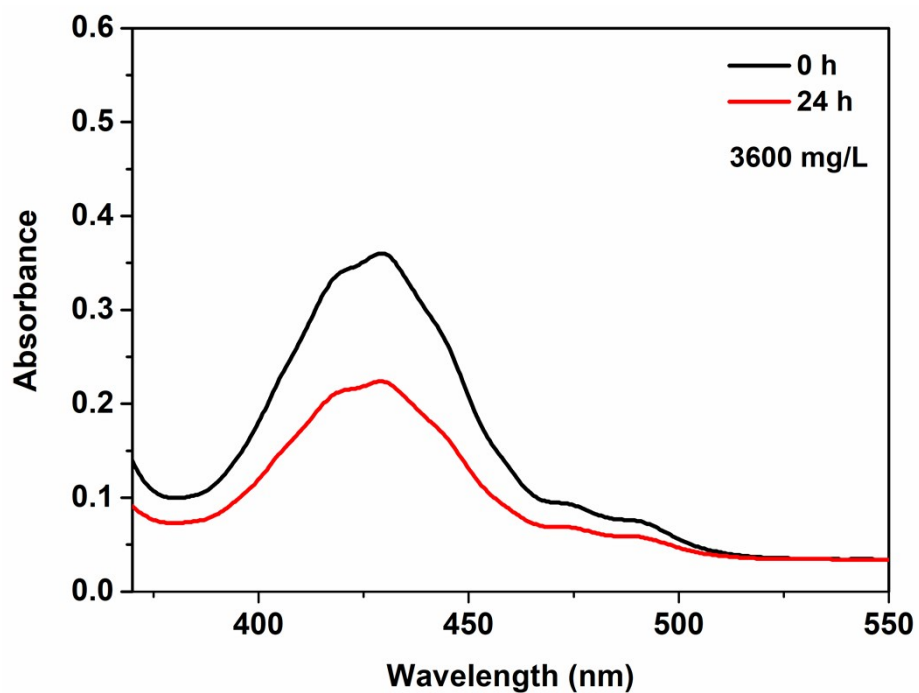

**Fig. S26** UV-vis spectra of the filtered solutions after immersing 5 mg of as-synthesized UPC-K1 in 4 mL of 3600 mg/L uranyl zinc acetate solutions at static state for 24 hours.

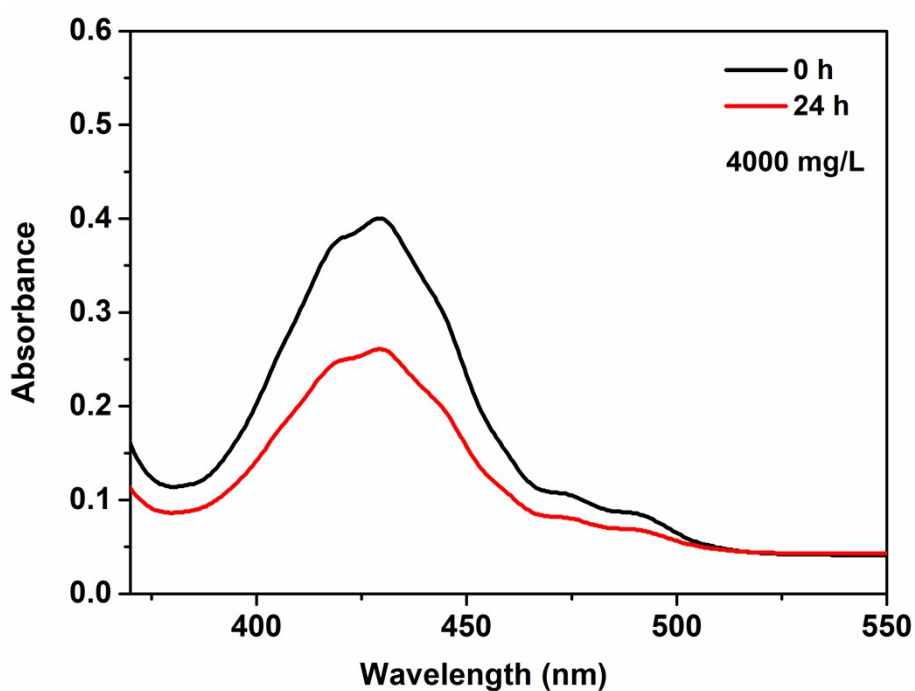

**Fig. S27** UV-vis spectra of the filtered solutions after immersing 5 mg of as-synthesized UPC-K1 in 4 mL of 4000 mg/L uranyl zinc acetate solutions at static state for 24 hours.



**Table S2** Comparison of uranium adsorption data with the reported materials except for the data listed or described in Ref. 1.

| Materials                          | Adsorption capacity<br>(mg/g) | pH range | Selectivity                                                                                     | Ref.      |
|------------------------------------|-------------------------------|----------|-------------------------------------------------------------------------------------------------|-----------|
| $\delta$ -MnO <sub>2</sub> @TpPa-1 | 1147.773                      | 6.5      | -                                                                                               | 8         |
| $\delta$ -MnO <sub>2</sub>         | 499.41                        | 6.5      | -                                                                                               | 8         |
| BSA–BT-NSs                         | 487.805                       | 5        | vs. Mn <sup>2+</sup> , Cs <sup>+</sup> , Co <sup>2+</sup> , Sr <sup>2+</sup>                    | 9         |
| UPC-K1                             | 486                           | 3-10     | vs. various metal ions                                                                          | This work |
| GOANS                              | 311.5                         | 4        | -                                                                                               | 6         |
| Fe@ZIF-8                           | 277.77                        | 4.5      | vs. Ce <sup>3+</sup> , Na <sup>+</sup> , Fe <sup>3+</sup> , Cu <sup>2+</sup> , Ca <sup>2+</sup> | 11        |
| FJSM-GAS-1                         | 196                           | 2.9-10.5 | vs. Na <sup>+</sup> , Ca <sup>2+</sup>                                                          | 3         |
| NU6CN                              | 195.55                        | 5        | -                                                                                               | 12        |
| MoS <sub>2</sub> -IP6 NRA/CC       | 183.3                         | 5.5      | vs. K <sup>+</sup> , Li <sup>+</sup> , Cr <sup>3+</sup> , Cu <sup>2+</sup> , Ca <sup>2+</sup>   | 7         |
| FJSM-GAS-2                         | 144                           | 2.9-10.5 | vs. Na <sup>+</sup> , Ca <sup>2+</sup>                                                          | 3         |
| CNFs                               | 125                           | 1-11     | -                                                                                               | 4         |
| HCTC                               | 96.99                         | 5.5      | -                                                                                               | 5         |
| MoS <sub>2</sub> nanosheets        | 45.7                          | 6        | -                                                                                               | 10        |

|                  |      |         |                        |   |
|------------------|------|---------|------------------------|---|
| Crystal hydrogel | 40.4 | 2.5-5.5 | vs. various metal ions | 2 |
|------------------|------|---------|------------------------|---|

## Reference

- 1 J. Li, X. Wang, G. Zhao, C. Chen, Z. Chai, A. Alsaedi, T. Haya and X. Wang, *Chem. Soc. Rev.*, 2018, **47**, 2322-2356.
- 2 F. Xiao, Y. Sun, W. Du, W. Shi, Y. Wu, S. Liao, Z. Wu and R. Yu, *Adv. Funct. Mater.*, 2017, **27**, 1702147.
- 3 M. Feng, D. Sarma, Y. Gao, X. Qi, W. Li, X. Huang and M. G. Kanatzidis, *J. Am. Chem. Soc.*, 2016, **138**, 12578-12585.
- 4 Y. Sun, Z. Wu, X. Wang, C. Ding, W. Cheng, S. Yu and X. Wang, *Environ. Sci. Technol.*, 2016, **50**, 4459-4467.
- 5 Z. Wang, Z. Liu, T. Ye, Y. Wang and L. Zhou, *J. Radioanal. Nucl. Chem.*, 2020, **326**, 1843-1852.
- 6 M. Gado, B. Atia and A. Morcy, *Int. J. Environ. Anal. Chem.*, 2019, **99**, 996-1015.
- 7 Y. Kou, L. Zhang, B. Liu, L. Zhu and T. Duan, *J. Radioanal. Nucl. Chem.*, 2020, **323**, 641-549.
- 8 X. Zhong, Z. Lu, W. Liang, X. Guo and B. Hu, *Environ. Sci.: Nano*, 2020, **7**, 3303-3317.
- 9 J. Yu, X. Luo, B. Liu, J. Zhou, J. Feng, W. Zhu, S. Wang, Y. Zhang, X. Lina and P. Chen, *J. Mater. Chem. A*, 2018, **6**, 15359-15370.
- 10 Y. Liu, C. Fang, S. Zhang, W. Zhong, Q. Wei, Y. Wang, Y. Dai, Y. Wang, Z. Zhang and Y. Liu, *Surf. and Interfaces*, 2020, **18**, 100409.
- 11 X. Zhang, Y. Liu, Y. Jiao, Q. Gao, P. Wang and Y. Yang, *Microp. Mesop. Mater.*, 2019, **277**, 52-59.
- 12 Y. Xie, C. Chen, X. Ren, X. Tan, G. Song, D. Chen, A. Alsaedi and T. Hayat, *J. Colloid Interf. Sci.*, 2019, **550**, 117-127.
